# Supplementary material for: Yeast Hog1 proteins are sequestered in stress granules during high-temperature stress
Source: Oxford University Press journal article supplement (doi:10.1242/jcs.209114), 2017-11-29
Supplement: jcs209114supp.pdf [file jcs209114supp.pdf]

**Table S1.** Comparison of amino acid sequences of P-body and SG components in *C. boidinii* with those in *S. cerevisiae*.

|                   | protein | identity (%) | similarity (%) |
|-------------------|---------|--------------|----------------|
| P-body components | Edc3    | 25           | 57             |
| SG components     | Pab1    | 56           | 76             |
|                   | Pbp1    | 23           | 55             |

**Table S2.** Intracellular localization of CbHog1-mCherry and CbEdc3-Venus derived from quantification of 50 cells after high temperature stress for 30 min.

|                     | Dot number / 50 cells |
|---------------------|-----------------------|
| Colocalized         | 43.3 ± 4.0            |
| CbHog1-mCherry only | 248.0 ± 10.5          |
| Pab1-Venus only     | 113.7 ± 6.0           |

Errors represent the S.D. of triplicate measurements.

**Table S3.** Yeast strains used in this study.

| Strain                      | Genotype                                                                                                       | Reference                |
|-----------------------------|----------------------------------------------------------------------------------------------------------------|--------------------------|
| <b><i>S. cerevisiae</i></b> |                                                                                                                |                          |
| BY4741                      | MATa <i>his3Δ1 leu2Δ0 met15Δ0 ura3Δ0</i>                                                                       | (Brachmann et al., 1998) |
| HS01                        | BY4741, <i>Schog1::ScHOG1-GFP, LEU2</i>                                                                        | This study               |
| HS02                        | BY4741, ( <i>P<sub>ScHOG1</sub>CbHOG1-Venus, LEU2</i>                                                          | This study               |
| HS03                        | BY4741, <i>Schog1::ScHOG1(1-350)-Venus, LEU2</i>                                                               | This study               |
| <b><i>C. boidinii</i></b>   |                                                                                                                |                          |
| AOU1                        | Wild type                                                                                                      | (Tani et al., 1985)      |
| TK62                        | <i>ura3</i>                                                                                                    | (Sakai et al., 1991)     |
| HC01                        | TK62, <i>Cbhog1Δ::URA3</i>                                                                                     | This study               |
| HC02                        | HC01, <i>ura3</i>                                                                                              | This study               |
| HC03                        | HC02, <i>ura3::(P<sub>CbHOG1</sub>CbHOG1-Venus, URA3)</i>                                                      | This study               |
| HC04                        | HC02, <i>ura3::(P<sub>CbACT1</sub>ScHOG1-Venus, URA3)</i>                                                      | This study               |
| HC05                        | HC02, <i>ura3::(P<sub>CbHOG1</sub>CbHOG1Δ(1-10)-Venus, URA3)</i>                                               | This study               |
| HC06                        | HC02, <i>ura3::(P<sub>CbHOG1</sub>CbHOG1Δ(1-17)-Venus, URA3)</i>                                               | This study               |
| HC07                        | HC02, <i>ura3::(P<sub>CbHOG1</sub>CbHOG1Δ(1-20)-Venus, URA3)</i>                                               | This study               |
| HC08                        | HC02, <i>ura3::(P<sub>CbHOG1</sub>CbHOG1Δ(1-30)-Venus, URA3)</i>                                               | This study               |
| HC09                        | HC02, <i>ura3::(P<sub>CbHOG1</sub>CbHOG1Δ(1-41)-Venus, URA3)</i>                                               | This study               |
| HC10                        | HC02, <i>ura3::(P<sub>CbHOG1</sub>CbHOG1Δ(348-398)-Venus, URA3)</i>                                            | This study               |
| HC11                        | HC02, <i>ura3::(P<sub>CbHOG1</sub>CbHOG1Δ(318-398)-Venus, URA3)</i>                                            | This study               |
| HC12                        | HC02, <i>ura3::(P<sub>CbHOG1</sub>CbHOG1Δ(300-398)-Venus, URA3)</i>                                            | This study               |
| HC13                        | HC02, <i>ura3::(P<sub>CbHOG1</sub>CbHOG1(1-20)-Venus, URA3)</i>                                                | This study               |
| HC14                        | HC02, <i>ura3::(P<sub>CbHOG1</sub>CbHOG1(1-30)-Venus, URA3)</i>                                                | This study               |
| HC15                        | HC02, <i>ura3::(P<sub>CbHOG1</sub>CbHOG1(1-40)-Venus, URA3)</i>                                                | This study               |
| HC16                        | HC02, <i>ura3::(P<sub>CbHOG1</sub>CbHOG1(1-50)-Venus, URA3)</i>                                                | This study               |
| HC17                        | HC02, <i>ura3::(P<sub>CbHOG1</sub>CbHOG1(346-398)-Venus, URA3)</i>                                             | This study               |
| HC18                        | HC02, <i>ura3::(P<sub>CbHOG1</sub>CbHOG1Δ(25-28)-Venus, URA3)</i>                                              | This study               |
| HC19                        | HC02, <i>ura3::(P<sub>CbHOG1</sub>CbHOG1Δ(35-40)-Venus, URA3)</i>                                              | This study               |
| HC20                        | HC02, <i>ura3::(P<sub>CbHOG1</sub>CbHOG1Δ(38-45)-Venus, URA3)</i>                                              | This study               |
| HC21                        | HC02, <i>ura3::(P<sub>CbHOG1</sub>CbHOG1Δ(39-45)-Venus, URA3)</i>                                              | This study               |
| HC22                        | HC02, <i>ura3::(P<sub>CbHOG1</sub>CbHOG1Δ(40-45)-Venus, URA3)</i>                                              | This study               |
| HC23                        | HC02, <i>ura3::(P<sub>CbHOG1</sub>CbHOG1Δ(43-45)-Venus, URA3)</i>                                              | This study               |
| HC24                        | HC02, <i>ura3::(P<sub>CbACT1</sub>ScHOG1-K52R-Venus, URA3)</i>                                                 | This study               |
| HC25                        | HC02, <i>ura3::(P<sub>CbACT1</sub>ScHOG1-T174A/Y176F-Venus, URA3)</i>                                          | This study               |
| HC26                        | HC02, <i>ura3::(P<sub>CbACT1</sub>ScHOG1 Venus-CAAXRas2, URA3)</i>                                             | This study               |
| HC27                        | HC02, <i>ura3::(P<sub>CbACT1</sub>ScHOG1(1-350)-Venus, URA3)</i>                                               | This study               |
| HC28                        | HC02, <i>ura3::(P<sub>CbHOG1</sub>CbHOG1-Sc(351-435)-Venus, URA3)</i>                                          | This study               |
| BUL                         | <i>ura3, leu2</i>                                                                                              | (Sakai and Tani 1992)    |
| SK01                        | BUL, <i>leu2::(P<sub>CbPAB1</sub>CbPAB1-Venus, LEU2), ura3::(P<sub>CbPBP1</sub>CbPBP1-mCherry, URA3)</i>       | This study               |
| HC30                        | BUL, <i>leu2::(P<sub>CbPAB1</sub>CbPAB1-Venus, LEU2), ura3::(P<sub>CbHOG1</sub>CbHOG1-mCherry, URA3)</i>       | This study               |
| HC31                        | HC02, <i>ura3::(P<sub>CbHOG1</sub>CbHOG1(K50R)-Venus, URA3)</i>                                                | This study               |
| HC32                        | BUL, <i>leu2::(P<sub>CbPAB1</sub>CbPAB1-Venus, LEU2), ura3::(P<sub>CbHOG1</sub>CbHOG1(K50R)-mCherry, URA3)</i> | This study               |
| HC33                        | HC02, <i>ura3::(P<sub>CbEDC3</sub>CbEDC3-Venus, URA3)</i>                                                      | This study               |
| HC34                        | BUL, <i>leu2::(P<sub>CbEDC3</sub>CbEDC3-Venus, LEU2), ura3::(P<sub>CbHOG1</sub>CbHOG1(K50R)-mCherry, URA3)</i> | This study               |
| HC35                        | HC02, <i>ura3::(P<sub>CbPAB1</sub>CbPAB1-Venus, URA3)</i>                                                      | This study               |
| <b><i>P. pastoris</i></b>   |                                                                                                                |                          |
| PPY12                       | <i>arg4 his4</i>                                                                                               | (Sakai et al., 1998)     |
| HP01                        | PPY12, <i>Pphog1Δ::Zeo<sup>r</sup></i>                                                                         | This study               |
| HP02                        | HP01, <i>arg4::(P<sub>PpHOG1</sub>PpHOG1-YFP, ARG4)</i>                                                        | This study               |
| <b><i>S. pombe</i></b>      |                                                                                                                |                          |
| FY14931                     | <i>ade6-216 leu1-32 lys1-131 ura4-D18 sty1::sty1-GFP-HA, Kan<sup>r</sup></i>                                   | Purchased from NBRP      |

**Table S4.** Primers used in this study.

| Designation                      | DNA sequence (5' → 3')                                    |
|----------------------------------|-----------------------------------------------------------|
| CbHOG1_UP_Fw                     | GGGCGAATTGGGTACGGCGCCGATGGAAATATGGAAACAGAGATG             |
| CbHOG1_UP_Rv                     | GGGGGGGCCCGGTACCACCCATACCAACTGGATTTAAA                    |
| CbHOG1_DOWN_Fw                   | CACCGCGGTGGAGCTCAACAACAGCTGTAACAATAATTCAAG                |
| CbHOG1_DOWN_Rv                   | ACAAAAGCTGGAGCTGAATTCACATGTCCAACAACAACAAC                 |
| CbHOG1_SPR_Fw                    | GATGGAAATATGGAAACAGAGATG                                  |
| CbHOG1_SPR_Rv                    | CAACATGTCCAACAACAACAAC                                    |
| CbHOG1_Vn_Fw                     | CTTTTGCTCACATGTGATGGAAATATGGAAACAGAGATGAAG                |
| CbHOG1_Vn_Rv                     | AGAAACCATGTCGACCAGCTGTTGTTGTTGTTGTTGTT                    |
| P <sub>CbACT1</sub> ScHOG1_Vn_Fw | ATATTACAAAAGTCGACATGACCACTAACGAGGAATTCATTAG               |
| P <sub>CbACT1</sub> ScHOG1_Vn_Rv | TTAGAAACCATGTCGACCTGTTGGAACCTATTAGCGTACTG                 |
| CbHOG1_Vn_Δ(1-10)_Fw             | TTTGTTACTATATTTGAAACAACAATAAGATACTC                       |
| CbHOG1_Vn_Δ(1-17)_Fw             | ACAAATAGATACTCAGATTTAAATCCAG                              |
| CbHOG1_Vn_Δ(1-20)_Fw             | TACTCAGATTTAAATCCAGTTGGTATGG                              |
| CbHOG1_Vn_Δ(1-30)_Fw             | GCATTTGGTTTAGTTTGTGCAGC                                   |
| CbHOG1_Vn_Δ(1-41)_Fw             | TTAACAAATCAAATGTTGCAATTAATAAAAAGTTATGAAACCTTTTT<br>C      |
| CbHOG1_Vn_Δ(348-398)_Rv          | TTCAACTTGATGGAAATCTAAGATTTAC                              |
| CbHOG1_Vn_Δ(318-398)_Rv          | ATCGAATTTTTCTTCAGCAACTGGTTC                               |
| CbHOG1_Vn_Δ(300-398)_Rv          | GTATTCATGTTCTAAAGCTTGTCTGC                                |
| CbHOG1_Vn_ΔN_Rv                  | CATTTTATTTATATCTATATATATATATATGTCTATTGTATATGTCTATT<br>GTC |
| HOG1_Vn_ΔC_Fw                    | GTCGACATGGTTTCTAAAGGTG                                    |
| CbHOG1_Vn_(1-20)_Rv              | TCTATTTGTTGTTTCAAATATAGTACCAAATATTTGAGTTC                 |
| CbHOG1_Vn_(1-30)_Rv              | ACCCATACCAACTGGATTTAAATCTG                                |
| CbHOG1_Vn_(1-40)_Rv              | ATCCTTTGCTGCACAACTAAACC                                   |
| CbHOG1_Vn_(1-50)_Rv              | TTTAATTGCAACATTTTGATTTGTTAATTTATCCTTTGC                   |
| CbHOG1_Vn_(346-398)_Rv           | GGTGCTGAAGCTGATGCTTTA                                     |
| CbHOG1_Vn_Δ(25-28)_Fw            | AGATTTAATGGGTGCATTTGGTTTAGTTG                             |
| CbHOG1_Vn_Δ(25-28)_Rv            | TGCACCCATTAATCTGAGTATCTATTTGTTGTTCAAATATAGTAC             |
| CbHOG1_Vn_Δ(35-40)_Fw            | TGGTTTAAAATTAACAAATCAAATGTTGCAATTAATAAAAAGTTATG<br>AA     |
| CbHOG1_Vn_Δ(35-40)_Rv            | GTTAATTTTAAACCAAATGCACCCATACCAA                           |
| CbHOG1_Vn_Δ(38-45)_Fw            | TTGTGCAAATGTTGCAATTAATAAAAAGTTATGAAACCTTTTTCA             |
| CbHOG1_Vn_Δ(38-45)_Rv            | GCAACATTTGCACAACTAAACCAAATGCAC                            |
| CbHOG1_Vn_Δ(39-45)_Fw            | TGCAGCAAATGTTGCAATTAATAAAAAGTTATGAAACCTTTTTCA             |
| CbHOG1_Vn_Δ(39-45)_Rv            | GCAACATTTGCTGCACAACTAAACCAAATG                            |
| CbHOG1_Vn_Δ(40-45)_Fw            | GCAGCAAAGAATGTTGCAATTAATAAAAAGTTATGAAACCTTTTTCAA          |
| CbHOG1_Vn_Δ(40-45)_Rv            | GCAACATTTCTTTGCTGCACAACTAAACCAAAT                         |
| CbHOG1_Vn_Δ(43-45)_Fw            | TAAATTAATGTTGCAATTAATAAAAAGTTATGAAACCTTTTTCAA             |
| CbHOG1_Vn_Δ(43-45)_Rv            | GCAACATTTAATTTATCCTTTGCTGCACAACTAAAC                      |
| CbHOG1_Vn_(K50R)_Fw              | GCAATTAATAAAAAGTTATGAAACCTTTTTCAACTGCTGTATTAG             |
| CbHOG1_Vn_(K50R)_Rv              | AACTTTTTTAATTGCAACTGGCTGCACAACTAAAC                       |
| CbHOG1_Vn_(1-398)_Fw             | CTGCAGGGAATTTAATCATTTTCAA                                 |
| CbHOG1_Vn_(1-398)_Rv             | CAGCTGTTGTTGTTGTTGTT                                      |
| CbPab1_Fw                        | CTTTTGCTCACATGTGGCGCTTAATTTTGGCTGAATC                     |
| CbPab1_Rv                        | AGAAACCATGTCGACGCGGATTCACCCTTCTTC                         |
| CbPbp1_Fw                        | CTTTTGCTCACATGTGACGCAATTGTTGGAATAATC                      |
| CbPbp1_Rv                        | ACTAACCATGTCGACAAATTTATAATGTCTCTTGAACCC                   |
| CbEde3_Fw                        | CTTTTGCTCACATGCTACTCTTCATTCTATAGCATG                      |
| CbEde3_Rv                        | AGAAACCATGTCGACAGATTGATAATTTCTAAAAGTGT                    |
| ScHOG1_KD_Fw                     | AAAATCATGAAACCTTTTTCCACTGCA                               |
| ScHOG1_KD_Rv                     | TCTAATGGCAACTGGCTGAGATG                                   |

|                     |                                                                  |
|---------------------|------------------------------------------------------------------|
| ScHOG1_nP_Fw        | GGCTTTGTTTCCACTAGATACTACAGG                                      |
| ScHOG1_nP_Rv        | AGCCATTTGAGGGTCTTGAATTCTTGCTAG                                   |
| ScHOG1_CAAX_Fw      | GGTTCTGGTGGTTGTTGTATTATTTCTTAACTGCAGGGAATTTAATC<br>ATTTTCAAC     |
| ScHOG1_CAAX_Rv      | TTTATATAATTCATCCATACCTAAAGTAATACCAG                              |
| ScHOG1_350_Fw       | ATCACTGCCACCAATCTTATGG                                           |
| ScHOG1CTag_Fw       | CGGTAACCAGGCCATACAGTACGCTAATGAGTTCCAACAGGTGAG<br>CAAGGGCGAGGAGCT |
| ScHog1CTag_Rv       | GAAGTAAGAATGAGTGGTTAGGGACATTAACAAAAACACGTGACC<br>TGTATCGCTCAAAAG |
| ScHog1_(351-435)_Fw | CAACAACAACAGCTGGGACAGATTGATATATCTGCC                             |
| ScHog1_(351-435)_Rv | TTAAATTCCCTGCAGTTATTTATATAATTCATCCATACCTAAAGTAA<br>TAC           |
| Zhog1_UPfw          | CGTTTAATAAAGCCAGCCATTTAGATCGTCTAGACTAACCTATACG<br>GGTTTAATGCC    |
| Zhog1_UPrv          | TGAAGCTATGGTGTGGAAGACTGCCGGTTTATCCTC                             |
| Zhog1_DWfw          | TTTGGTCATGAGATCCTGTTCTGCCAAGGACAAGC                              |
| Zhog1_DWrv          | GGCATTAAACCCGTATAGGTTAGTCTAGACGATCTAAATGGCTGGC<br>TTTATTAACG     |
| pPICZ_Zeo_fw        | CACACCATAGCTTCAAATGTTTCTAC                                       |
| pPICZ_Zeo_rv        | GATCTCATGACCAAAATCCCTTAAC                                        |
| PpHog1IF_fw         | GGTACCCGGGGATCCCTAACCTATACGGGTTTAATGCC                           |
| PpHog1IF_rv         | CAGCTCGAGACTAGTTTGATCCTCAACTTGATGGAAGTC                          |

**Table S5.** Plasmids used in this study.

| Designation                 | Description                                                                   | Reference                     |
|-----------------------------|-------------------------------------------------------------------------------|-------------------------------|
| <b><i>S. cerevisiae</i></b> |                                                                               |                               |
| pMO152                      | EGFP <i>LEU2</i>                                                              | Oku <i>et al.</i> (In press)  |
| <b><i>C. boidinii</i></b>   |                                                                               |                               |
| SK+SPR                      | <i>URA3</i>                                                                   | (Sakai & Tani 1992)           |
| pHC100                      | Hog1-UPregion <i>URA3</i>                                                     | This study                    |
| pHC101                      | Hog1-UPregion Hog1-DOWNregion <i>URA3</i>                                     | This study                    |
| pKK001                      | P <sub>CbACT1</sub> Venus <i>URA3</i>                                         | (Kawaguchi <i>et al</i> 2011) |
| pHC200                      | P <sub>CbHOG1</sub> <i>CbHOG1</i> -Venus <i>URA3</i>                          | This study                    |
| pHC300                      | P <sub>CbACT1</sub> <i>ScHOG1</i> -Venus <i>URA3</i>                          | This study                    |
| pHC201                      | P <sub>CbHOG1</sub> <i>CbHOG1</i> Δ(1-10)-Venus <i>URA3</i>                   | This study                    |
| pHC202                      | P <sub>CbHOG1</sub> <i>CbHOG1</i> Δ(1-17)-Venus <i>URA3</i>                   | This study                    |
| pHC203                      | P <sub>CbHOG1</sub> <i>CbHOG1</i> Δ(1-20)-Venus <i>URA3</i>                   | This study                    |
| pHC204                      | P <sub>CbHOG1</sub> <i>CbHOG1</i> Δ(1-30)-Venus <i>URA3</i>                   | This study                    |
| pHC205                      | P <sub>CbHOG1</sub> <i>CbHOG1</i> Δ(1-41)-Venus <i>URA3</i>                   | This study                    |
| pHC206                      | P <sub>CbHOG1</sub> <i>CbHOG1</i> Δ(348-398)-Venus <i>URA3</i>                | This study                    |
| pHC207                      | P <sub>CbHOG1</sub> <i>CbHOG1</i> Δ(318-398)-Venus <i>URA3</i>                | This study                    |
| pHC208                      | P <sub>CbHOG1</sub> <i>CbHOG1</i> Δ(300-398)-Venus <i>URA3</i>                | This study                    |
| pHC209                      | P <sub>CbHOG1</sub> <i>CbHOG1</i> (1-20)-Venus <i>URA3</i>                    | This study                    |
| pHC210                      | P <sub>CbHOG1</sub> <i>CbHOG1</i> (1-30)-Venus <i>URA3</i>                    | This study                    |
| pHC211                      | P <sub>CbHOG1</sub> <i>CbHOG1</i> (1-40)-Venus <i>URA3</i>                    | This study                    |
| pHC212                      | P <sub>CbHOG1</sub> <i>CbHOG1</i> (1-50)-Venus <i>URA3</i>                    | This study                    |
| pHC213                      | P <sub>CbHOG1</sub> <i>CbHOG1</i> (346-398)-Venus <i>URA3</i>                 | This study                    |
| pHC214                      | P <sub>CbHOG1</sub> <i>CbHOG1</i> Δ(25-30)-Venus <i>URA3</i>                  | This study                    |
| pHC215                      | P <sub>CbHOG1</sub> <i>CbHOG1</i> Δ(35-40)-Venus <i>URA3</i>                  | This study                    |
| pHC216                      | P <sub>CbHOG1</sub> <i>CbHOG1</i> Δ(38-45)-Venus <i>URA3</i>                  | This study                    |
| pHC217                      | P <sub>CbHOG1</sub> <i>CbHOG1</i> Δ(39-45)-Venus <i>URA3</i>                  | This study                    |
| pHC218                      | P <sub>CbHOG1</sub> <i>CbHOG1</i> Δ(40-45)-Venus <i>URA3</i>                  | This study                    |
| pHC219                      | P <sub>CbHOG1</sub> <i>CbHOG1</i> Δ(43-45)-Venus <i>URA3</i>                  | This study                    |
| pHC220                      | P <sub>CbHOG1</sub> <i>CbHOG1</i> (K50R)-Venus <i>URA3</i>                    | This study                    |
| pHC221                      | P <sub>CbHOG1</sub> <i>CbHOG1</i> (K50R)-mCherry <i>URA3</i>                  | This study                    |
| pSPM001                     | P <sub>CbACT1</sub> mCherry <i>URA3</i>                                       | (Shiraishi <i>et al</i> 2015) |
| pHC400                      | P <sub>CbHOG1</sub> <i>CbHOG1</i> -mCherry <i>URA3</i>                        | This study                    |
| pHC401                      | P <sub>CbPAB1</sub> <i>CbPAB1</i> -Venus <i>URA3</i>                          | This study                    |
| pHC402                      | P <sub>CbPAB1</sub> <i>CbPAB1</i> -Venus <i>LEU2</i>                          | This study                    |
| pHC403                      | P <sub>CbPAB1</sub> <i>CbPBPI</i> -mCherry <i>URA3</i>                        | This study                    |
| pHC404                      | P <sub>CbPAB1</sub> <i>CbEDC3</i> -Venus <i>URA3</i>                          | This study                    |
| pHC405                      | P <sub>CbPAB1</sub> <i>CbEDC3</i> -Venus <i>LEU2</i>                          | This study                    |
| pHC500                      | P <sub>CbACT1</sub> <i>ScHOG1</i> -Venus <i>URA3</i>                          | This study                    |
| pHC501                      | P <sub>CbACT1</sub> <i>ScHOG1</i> -K52R-Venus <i>URA3</i>                     | This study                    |
| pHC502                      | P <sub>CbACT1</sub> <i>ScHOG1</i> -T174A/Y176F-Venus <i>URA3</i>              | This study                    |
| pHC503                      | P <sub>CbACT1</sub> <i>ScHOG1</i> -Venus-CAAX <sup>Ras2</sup> <i>URA3</i>     | This study                    |
| pHC504                      | P <sub>CbACT1</sub> <i>ScHOG1</i> (1-350)-Venus <i>URA3</i>                   | This study                    |
| pHC505                      | P <sub>CbHOG1</sub> <i>CbHOG1</i> - <i>ScHOG1</i> (351-435)-Venus <i>URA3</i> | This study                    |
| <b><i>P. pastoris</i></b>   |                                                                               |                               |
| pPICZ A                     | <i>P. pastoris</i> expression vector, Zeo <sup>r</sup>                        | Purchased from Invitrogen     |
| pHP001                      | PpHog1-UPregion PpHog1-DOWNregion Zeocin                                      | This study                    |
| nNT204                      | pIB1 <i>ARG4</i>                                                              | (Tamura <i>et al</i> 2010)    |
| pHP100                      | P <sub>PpHOG1</sub> <i>PpHOG1</i> -YFP <i>ARG4</i>                            | This study                    |

## References for Tables S3, S4, and S5

- Brachmann, C. B., Davies, A., Cost, G. J., Caputo, E., Li, J., Hieter, P. and Boeke, J. D.** (1998). Designer deletion strains derived from *Saccharomyces cerevisiae* S288C: a useful set of strains and plasmids for PCR-mediated gene disruption and other applications. *Yeast* **14**, 115-132.
- Kawaguchi, K., Yurimoto, H., Oku, M. and Sakai, Y.** (2011). Yeast methylotrophy and autophagy in a methanol-oscillating environment on growing *Arabidopsis thaliana* leaves. *PloS One* **6**, e25257.
- Sakai, Y., Kazarimoto, T. and Tani, Y.** (1991). Transformation system for an asporogenous methylotrophic yeast, *Candida boidinii*: cloning of the orotidine-5'-phosphate decarboxylase gene (*URA3*), isolation of uracil auxotrophic mutants, and use of the mutants for integrative transformation. *J. Bacteriol.* **173**, 7458-7463.
- Sakai, Y., Koller, A., Rangell, L. K., Keller, G. A. and Subramani, S.** (1998). Peroxisome degradation by microautophagy in *Pichia pastoris*: identification of specific steps and morphological intermediates. *J. Cell Biol.* **141**, 625-636.
- Sakai, Y. and Tani, Y.** (1992). Directed mutagenesis in an asporogenous methylotrophic yeast: cloning, sequencing, and one-step gene disruption of the 3-isopropylmalate dehydrogenase gene (*LEU2*) of *Candida boidinii* to derive doubly auxotrophic marker strains. *J Bacteriol.* **174**, 5988-5993.
- Shiraishi, K., Oku, M., Kawaguchi, K., Uchida, D., Yurimoto, H. and Sakai, Y.** (2015). Yeast nitrogen utilization in the phyllosphere during plant lifespan under regulation of autophagy. *Sci. Rep.* **5**, 9719.
- Tamura, N., Oku, M. and Sakai, Y.** (2010). Atg8 regulates vacuolar membrane dynamics in a lipidation-independent manner in *Pichia pastoris*. *J. Cell Sci.* **123**, 4107-4116.
- Tani, Y., Sakai, Y. and Yamada, H.** (1985). Isolation and Characterization of a Mutant of a Methanol Yeast, *Candida boidinii* S2, with Higher Formaldehyde Productivity. *Agric. Biol. Chem.* **49**, 2699-2706.

SUPPLEMENTARY FIGURES

Fig. S1

**A**

|        |                                                                        |     |
|--------|------------------------------------------------------------------------|-----|
| CbHog1 | -MAQE-FTRTQIFGTIFETTNRYSDLNVPVGMGAFGLVCAAKDKLTNQNVAIKVKMKPFST          | 58  |
| ScHog1 | MTTNEEFIRTQIFGTVFEITNRYNDLNPVGMGAFGLVCSATDTLT SQPVAIKKIMKPFST          | 60  |
| PpHog1 | -MSQEKFTRTQIFGTIFETTARYDELNVPVGMGAFGLVCSAKDKLTEQQVAIKKIMKPFST          | 59  |
| SpSty1 | --MAEFIRTQIFGTCFEITTRYSDLQPIGMGAFGLVCSAKDQLTGMNVAVKKIMKPFST            | 57  |
|        | * ***** ** * ** .: : : *****: . * ** **: : : *****                     |     |
|        |                                                                        |     |
| CbHog1 | AVLAKRTYRELKLLNHLRHENLISLDDIFLSPLEDIYFVTELOQGTDLHRLTSTRPLEKQF          | 118 |
| ScHog1 | AVLAKRTYRELKLLKHLRHENLISLQDIFLSPLEDIYFVTELOQGTDLHRLTSTRPLEKQF          | 120 |
| PpHog1 | PVLAKRTYRELKLLNHLRHENLITLTDIFLSPLEDIYIVTELOQGTDLHRLTSTRPLEKQF          | 119 |
| SpSty1 | PVLAKRTYRELKLLKHLRHENIISLSDIFISPFEDIYFVTELOQGTDLHRLTSTRPLETQF          | 117 |
|        | .*****:*****:* * ***:**:* ***:**:* ***:**:* ***:**:* ***:**:*          |     |
|        |                                                                        |     |
| CbHog1 | IQYFLYQILRGLKVFVHSSGVIHRDLKPSNILINENCDLKICDFGLARVQDPQMTGYVSTR          | 178 |
| ScHog1 | VQYFLYQILRGLKYVHSAGVIHRDLKPSNILINENCDLKICDFGLARIQDPQMTGYVSTR           | 180 |
| PpHog1 | IQYFLYQILRALKYVHSAGVIHRDLKPSNILINENCDLKICDFGLARIQDHQMTGYVSTR           | 179 |
| SpSty1 | IQYFLYQILRGLKVFVHSAGVIHRDLKPSNILINENCDLKICDFGLARIQDPQMTGYVSTR          | 177 |
|        | :*****.**:***:*****:*****:*****:*****:*****:*****:*****                |     |
|        |                                                                        |     |
| CbHog1 | YYRAPEIMLTWQKYDTEVDIWSAGCIFAEMIEGKPLFPKGDHVFQFSIITELLGSPPKDV           | 238 |
| ScHog1 | YYRAPEIMLTWQKYDVEVDIWSAGCIFAEMIEGKPLFPKGDHVFQFSIITDLLGSPPKDV           | 240 |
| PpHog1 | YYRAPEIMLTWQKYDTEVDIWSAGCIFAEMIEGKPLFPKGDHINQFSIITELLGSPPTDV           | 239 |
| SpSty1 | YYRAPEIMLTWQKYNVEVDIWSAGCIFAEMIEGKPLFPGRDHVNQFSIITELLGTPPMEV           | 237 |
|        | *****:*****:*****:*****:*****:*****:*****:*****:*****                  |     |
|        |                                                                        |     |
| CbHog1 | IDTICSENTLRFVQSLPHRDPPIPFNEKFKGVEPEAIDLKMLVDFPRKRVTAEQALEHE            | 298 |
| ScHog1 | INTICSENTLKFVTSPLPHRDPPIPFSEKFKTVEPDAVDLLEKMLVDFPKKRITAADALAHF         | 300 |
| PpHog1 | IDTICSENTLRFVQSLPHREPVPLIERFQGVPEAIDLLEKMLVDFDARKKRITAEE SLAHE         | 299 |
| SpSty1 | IETICSKNTLRFVQSLPQKEKVPFAEKFKNADPD AIDLLEKMLVDFPRKRISAADALAHN          | 297 |
|        | *:****:* ***:** * ***: : : * *: * *: . : * * : * * : * * : * * : * * * |     |
|        |                                                                        |     |
| CbHog1 | YLSPYHDPDTPVAEEKFDWSFNADLDPVDTWRVMMYSEILDFHQVEGAEADALQQVQVG            | 358 |
| ScHog1 | YSAPYHDPDTPVADAKFDWHFNADLDPVDTWRVMMYSEILDFHKIGGSDGQIDISATFD            | 360 |
| PpHog1 | YLEPYHDPDTPVAEEKFDWSFNADLDPVDTWRVMMYSEILDFHQVEDQ-----                  | 348 |
| SpSty1 | YLAPYHDPDTPVADEVFDWSFQDNDLDPVETWKVMMYSEVLSFHNMDNELQS-----              | 349 |
|        | * ***** ** * * : * * : * * : * * : * * : * * : * * : * * : * * :       |     |
|        |                                                                        |     |
| CbHog1 | QYEHSMTLQQQQQHQIQKQQELQENELLQQQQQQQQQL-----                            | 398 |
| ScHog1 | DQVAAATAAAQAQAQAQVQLNMAAHSNGAGTTGNDHSDIAGGNKVS DHVAANDTIT              | 420 |
| PpHog1 | -----                                                                  |     |
| SpSty1 | -----                                                                  |     |
|        |                                                                        |     |
| CbHog1 | -----                                                                  |     |
| ScHog1 | DYGNQAIQYANEFQQ                                                        | 435 |
| PpHog1 | -----                                                                  |     |
| SpSty1 | -----                                                                  |     |

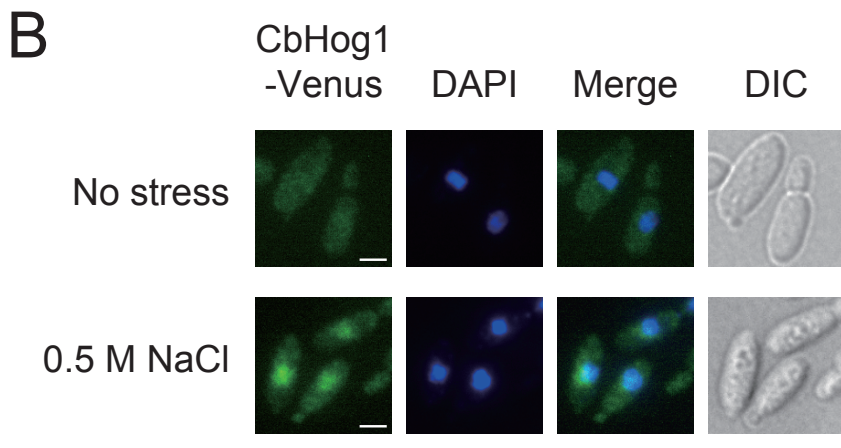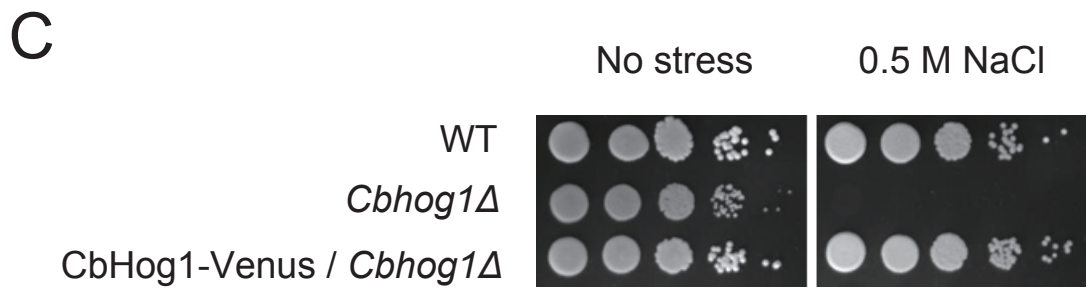



**Fig. S1. CbHog1 is required for tolerance to high salt stress.** (A) Alignment of the amino acid sequences of Hog1 homolog proteins from four yeast species, *C. boidinii*, *S. cerevisiae*, *P. pastoris*, and *S. pombe*. The CLUSTLW program was used to align the amino acid sequences of CbHog1, ScHog1, PpHog1 and SpSty1. The residues mutated in this study are marked in red. (B) Microscopic images of the *C. boidinii hog1Δ* strain expressing CbHog1-Venus. Cells were grown to early log phase in SD medium and shifted to SD medium supplemented with 0.5 M NaCl as high-osmolarity stress. DAPI was used for nuclear staining. Merged images were generated by combining the Venus (green) and DAPI (blue) fluorescence images. (C) Growth assay under high osmotic condition. The wild-type and the indicated mutant strains of *C. boidinii* were grown to early log phase, adjusted to  $OD_{610} = 1$ , and 3  $\mu$ L of each ten-fold serial dilutions were dropped onto YPD plates with or without 0.5 M NaCl. Cells were incubated at 28°C and cell growth was scored after 2 days.

## Fig. S2

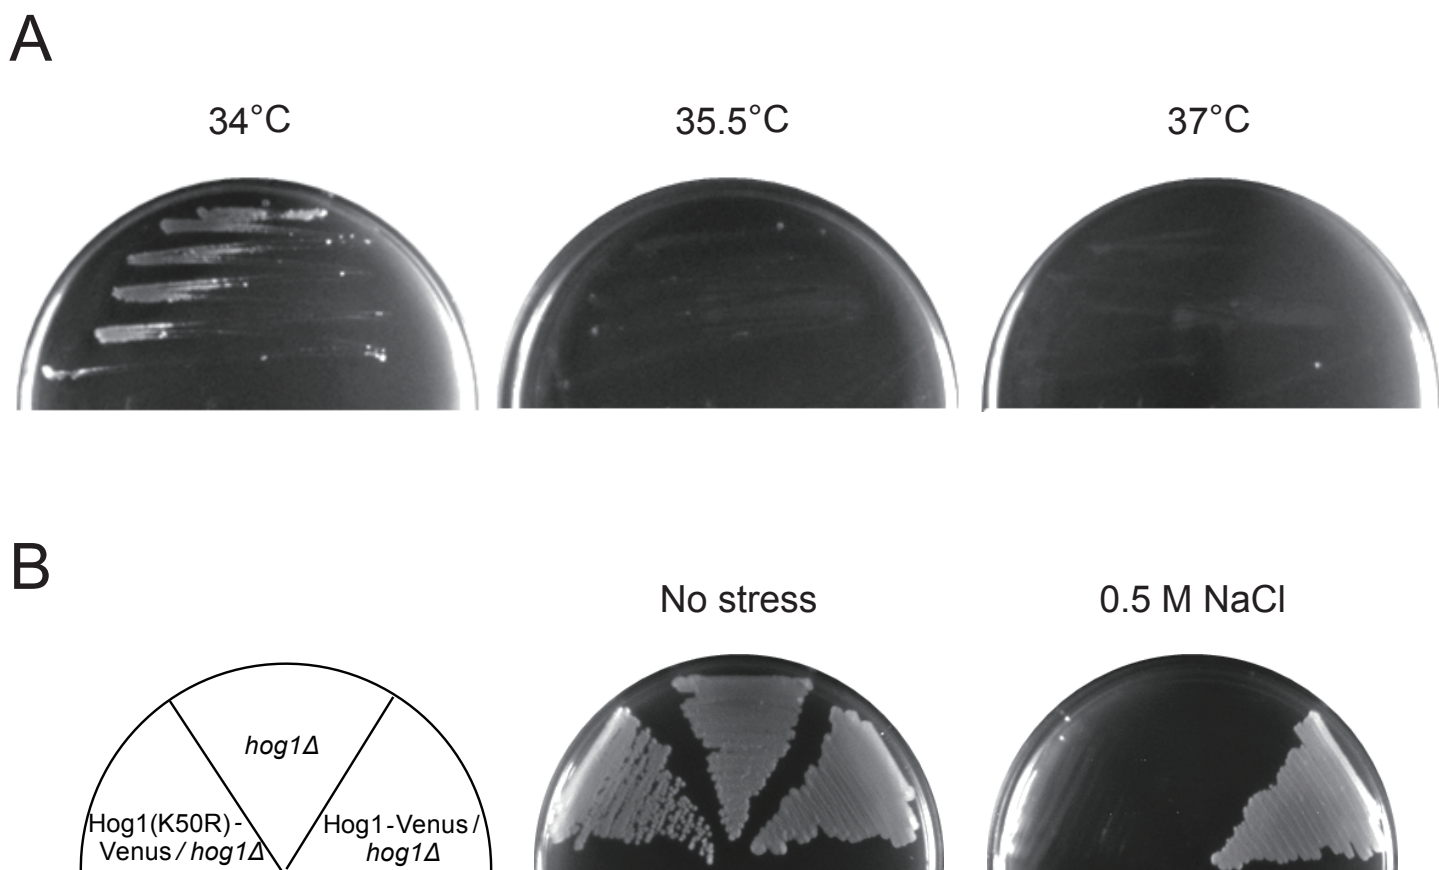

**Fig. S2. Growth of *C. boidinii* strains under high-temperature or high-salt conditions.**

(A) Growth of *C. boidinii* under high-temperature conditions. Cells spread on the YPD plates were incubated at 34, 35.5 or 37°C and cell growth was scored after 2 days. (B) Growth assay of the *Cbhog1Δ* strain and the *Cbhog1Δ* strains expressing CbHog1-Venus or CbHog1(K50R)-Venus under high-salt condition. Cells were grown to early log phase, adjusted to  $OD_{610} = 1$ , and 3  $\mu$ L of each ten-fold serial dilutions were dropped onto YPD plates without or with 0.5 M NaCl. Cells were incubated at 28°C and cell growth was scored after 3 days.

## Fig. S3

A

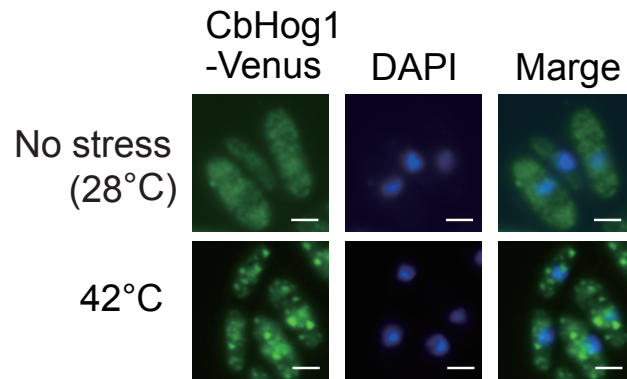

B

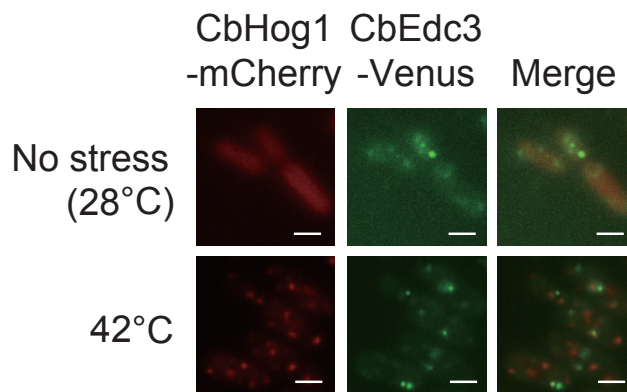

C

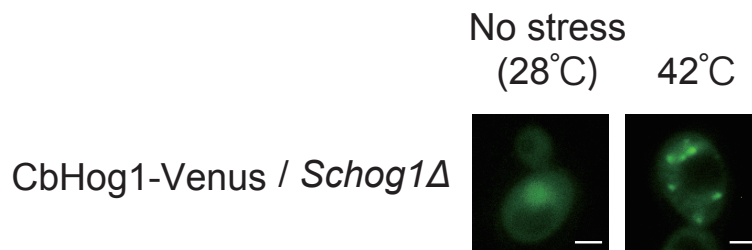

D

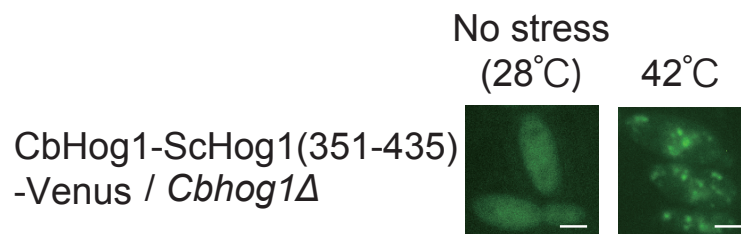

**Fig. S3. Microscopic images of various strains.** (A) Microscopic images of the *C. boidinii* strain expressing CbHog1-Venus. Cells were grown to early log phase, and treated with indicated high-temperature stress for 30 min. Merged images were generated by combining the Venus (green) and DAPI (blue) fluorescence images. (B) Microscopic images of the *C. boidinii* strain expressing CbHog1-mCherry and CbEdc3-Venus. Cells were grown to early log phase, and treated with indicated high-temperature stress for 30 min. Merged images were generated by combining the mCherry (red) and Venus (green) fluorescence images. (C) Microscopic images of the *S. cerevisiae hog1Δ* strain expressing CbHog1-Venus under the control of the *ScHog1* promoter. Cells were grown to early log phase in SD medium, and treated with high-temperature stress (42°C, 30 min). (D) Microscopic images of the *Cbhog1Δ* strain expressing CbHog1-ScHog1(351-435)-Venus. Cells were grown to early log phase in SD medium, and treated with high-temperature stress (42°C, 30 min).

## Fig. S4

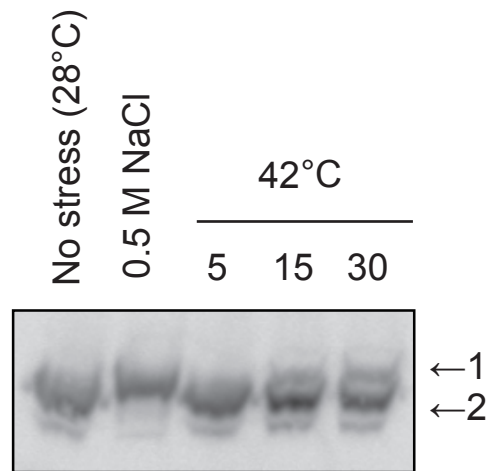

**Fig. S4. CbHog1 is partially phosphorylated upon high-temperature stress.** Immunoblot analysis of Venus-tagged Hog1 with Phos-tag SDS-PAGE under high-osmolarity (0.5 M NaCl, 5 min) or high-temperature stress (42°C, 5, 15 or 30 min). 1, phosphorylated CbHog1-Venus; 2, CbHog1-Venus.
